# Supplementary material for: Extensive genic and allelic heterogeneity underlying inherited retinal dystrophies in Mexican patients molecularly analyzed by next‐generation sequencing
Source: PubMed Central journal article supplement (PMC6978239; doi:10.1002/mgg3.1044), 2019-11-17
Supplement: MGG3-8-0-s001.pdf [file MGG3-8-0-s001.pdf]

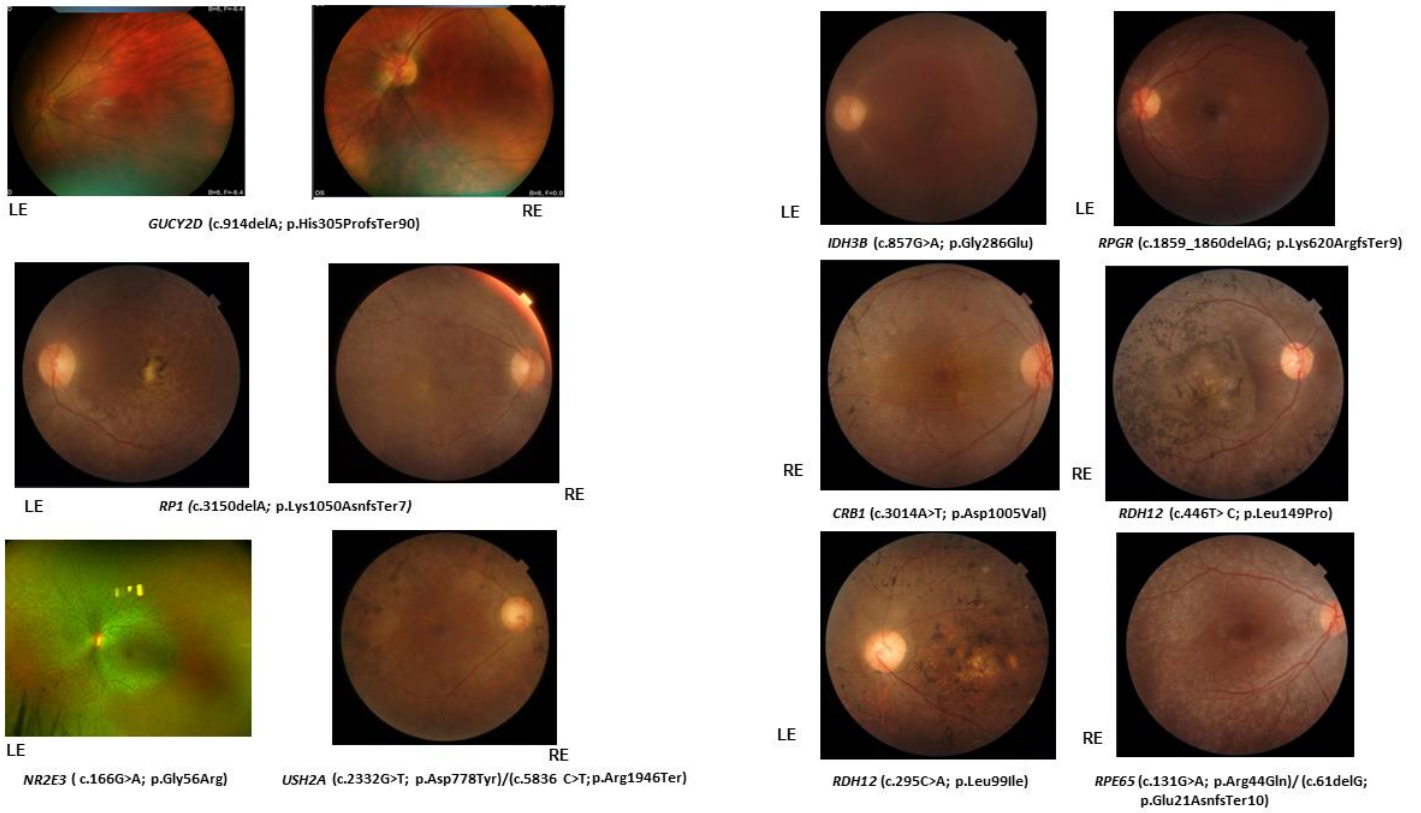

**Supp. Figure S1.-** Selected retinal phenotypes in RD patients from our cohort. The identified pathogenic variant is indicated in each case. For specific diagnosis see table 2.  
**LE:** left eye; **RE:** right eye.

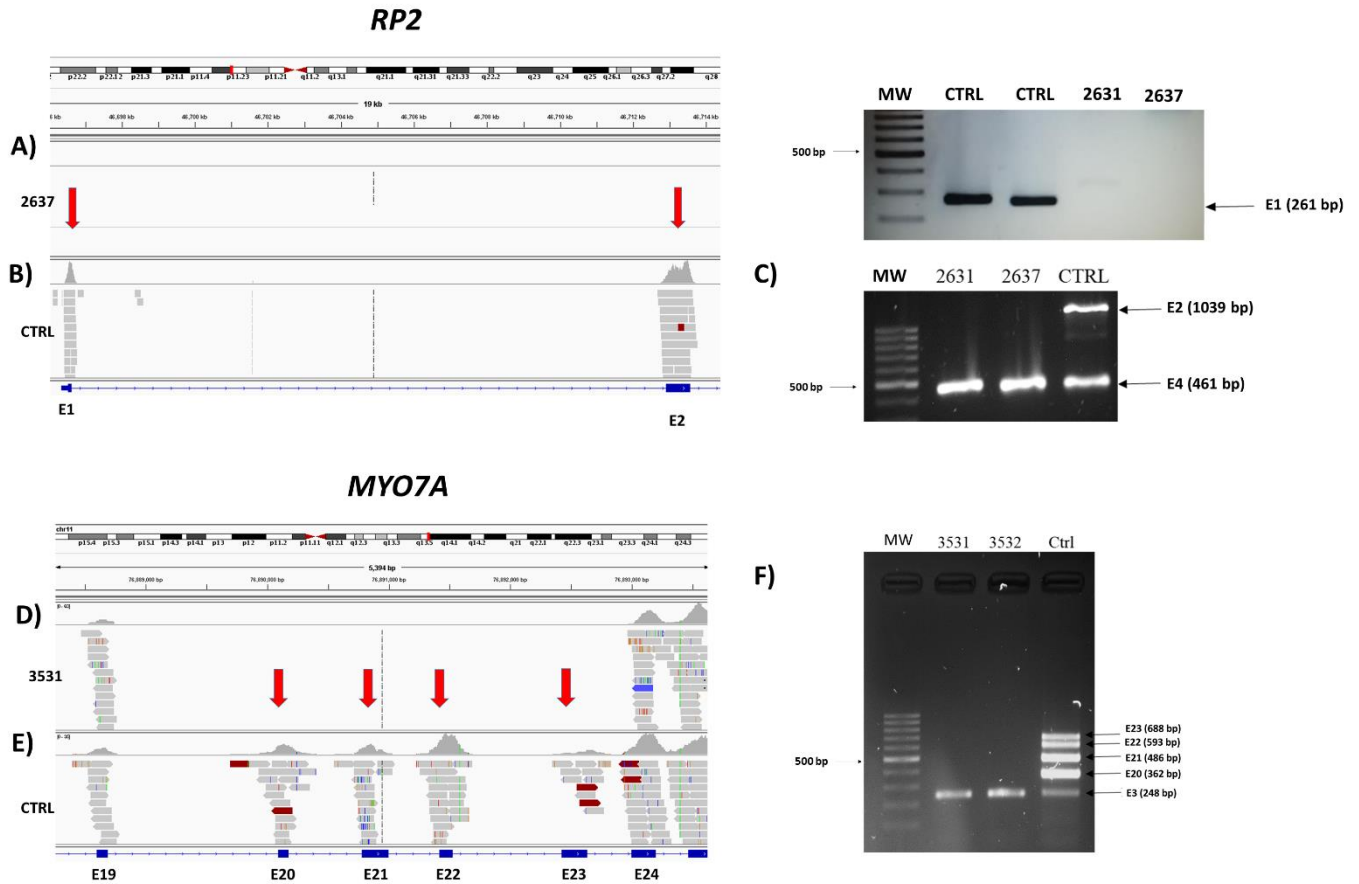

**Supp. Figure S2.-** Coverage analysis revealed large intragenic deletions in 2 different RD cases. Aligned reads in .bam files of patients 2637 (**A**), 3531 (**D**), diagnosed with AR RP and Usher syndrome, respectively, were visualized through IGV and compared to control samples (**B**, **E**) from the same NGS run. In **A**, a hemizygous deletion of RP2 exons 1-2 (E1 and E2) is demonstrated. In **D**, homozygous deletion of MYO7A exons 20-23 (E20-E23) is observed; red arrows indicate the exonic region(s) with no detectable reads. Subsequent PCR analysis of apparently deleted exons in DNA from the patients, affected relatives (2631 and 3532), and from control DNA (**C**, **F**) was used to confirm intragenic deletions detected through coverage analysis. **MW**: Molecular weight ladder (100 bp); **Ctrl**: Control DNA.

**Supp. Table S1.- List of retinal dystrophy genes included in the ClearSeq Inherited Disease sequencing panel.**

| GENE                          | LOCUS        | MIM#   | INHERITANCE | NM_ID          | RELATED CONDITIONS                                  |
|-------------------------------|--------------|--------|-------------|----------------|-----------------------------------------------------|
| <b>Only Non-Syndromic RDs</b> |              |        |             |                |                                                     |
| <i>ABCA4</i>                  | 1p22.1       | 601691 | AR          | NM_000350.2    | STGD; RP; MD; CRD                                   |
| <i>ADAM9</i>                  | 8p11.22      | 602713 | AR          | NM_003816.2    | CRD                                                 |
| <i>AIPL1</i>                  | 17p13.2      | 604392 | AD, AR      | NM_014336.3    | LCA; RP; CRD                                        |
| <i>BEST1</i>                  | 11q12.3      | 607854 | AD, AR      | NM_001139443.1 | MD; RP; vitreoretinopathology                       |
| <i>PCARE</i>                  | 2p23.2       | 613425 | AR          | NM_001029883.2 | RP                                                  |
| <i>C1QTNF5</i>                | 11q23.3      | 608752 | AD          | NM_015645.4    | Late-onset retinal degeneration                     |
| <i>CA4</i>                    | 17q23.1      | 114760 | AD          | NM_000717.3    | RP                                                  |
| <i>CABP4</i>                  | 11q13.2      | 608965 | AR          | NM_145200.3    | CSNB; LCA                                           |
| <i>CACNA1F</i>                | Xp11.23      | 300110 | XL          | NM_005183.2    | CSNB; CRD                                           |
| <i>CACNA2D4</i>               | 12p13.33     | 608171 | AR          | NM_172364.4    | CRD                                                 |
| <i>CDHR1</i>                  | 10q23.1      | 609502 | AR          | NM_033100.3    | CRD                                                 |
| <i>CERKL</i>                  | 2q31.3       | 608381 | AR          | NM_001030311.2 | RP; CRD                                             |
| <i>CHM</i>                    | Xq21.2       | 300390 | XL          | NM_000390.2    | Choroideremia                                       |
| <i>CNGA1</i>                  | 4p12         | 123825 | AR          | NM_001142564.1 | RP                                                  |
| <i>CNGA3</i>                  | 2q11.2       | 600053 | AR          | NM_001298.2    | Achromatopsia; CRD                                  |
| <i>CNGB1</i>                  | 16q21        | 600724 | AR          | NM_001297.4    | RP                                                  |
| <i>CNGB3</i>                  | 8q21.3       | 605080 | AR          | NM_019098.4    | Achromatopsia; CRD                                  |
| <i>CRB1</i>                   | 1q31.3       | 604210 | AD; AR      | NM_201253.2    | LCA; RP; Pigmented paravenous chorioretinal atrophy |
| <i>CRX</i>                    | 19q13.33     | 602225 | AD; AR      | NM_000554.4    | LCA; RP                                             |
| <i>CYP4V2</i>                 | 4q35.1-q35.2 | 608614 | AR          | NM_207352.3    | Bietti crystalline corneoretinal dystrophy          |
| <i>DHDDS</i>                  | 1p36.11      | 608172 | AR          | NM_024887.3    | RP                                                  |
| <i>EFEMP1</i>                 | 2p16.1       | 601548 | AD          | NM_001039348.2 | Doyme honeycomb degeneration of retina              |
| <i>EYS</i>                    | 6q12         | 612424 | AR          | NM_001142800.1 | RP                                                  |
| <i>FAM161A</i>                | 2p15         | 613596 | AR          | NM_001201543.1 | RP                                                  |
| <i>FBLN5</i>                  | 14q32.12     | 604580 | AD          | NM_006329.3    | AMD                                                 |
| <i>FSCN2</i>                  | 17q25.3      | 607643 | AD          | NM_001077182.2 | RP, AMD                                             |
| <i>FZD4</i>                   | 11q14.2      | 604579 | AD          | NM_012193.3    | Exudative vitreoretinopathy                         |
| <i>GDF6</i>                   | 8q22.1       | 601147 | AR          | NM_001001557.2 | LCA                                                 |
| <i>GNAT1</i>                  | 3p21.31      | 139330 | AD; AR      | NM_000172.3    | CSNB                                                |
| <i>GNAT2</i>                  | 1p13.3       | 139340 | AR          | NM_005272.3    | Achromatopsia                                       |
| <i>GPR179</i>                 | 17q12        | 614515 | AR          | NM_001004334.2 | CSNB                                                |
| <i>GRK1</i>                   | 13q34        | 180381 | AR          | NM_002929.2    | CSNB; Oguchi disease                                |
| <i>GRM6</i>                   | 5q35.3       | 604096 | AR          | NM_000843.3    | CSNB                                                |
| <i>GUCA1A</i>                 | 6p21.1       | 600364 | AD          | NM_000409.3    | CRD                                                 |
| <i>GUCA1B</i>                 | 6p21.1       | 602275 | AD          | NM_002098.5    | RP; MD                                              |
| <i>GUCY2D</i>                 | 17p13.1      | 600179 | AD; AR      | NM_000180.3    | CRD; LCA                                            |
| <i>HK1</i>                    | 10q22.1      | 142600 | AD          | NM_033497.2    | RP                                                  |
| <i>IDH3B</i>                  | 20p13        | 604526 | AR          | NM_006899.3    | RP                                                  |
| <i>IMPDH1</i>                 | 7q32.1       | 146690 | AD          | NM_000883.3    | LCA; RP                                             |
| <i>IMPG2</i>                  | 3q12.3       | 607056 | AD; AR      | NM_016247.3    | RP; MD                                              |
| <i>KCNJ13</i>                 | 2q37.1       | 603208 | AD; AR      | NM_002242.4    | Vitreoretinal degeneration; LCA                     |
| <i>KCNV2</i>                  | 9p24.2       | 607604 | AR          | NM_133497.3    | CRD                                                 |
| <i>KLHL7</i>                  | 7p15.3       | 611119 | AD          | NM_001031710.2 | RP                                                  |
| <i>LCA5</i>                   | 6q14.1       | 611408 | AR          | NM_181714.3    | LCA                                                 |
| <i>LRAT</i>                   | 4q32.1       | 604863 | AR          | NM_004744.3    | LCA; RP                                             |
| <i>MAK</i>                    | 6p24.2       | 154235 | AR          | NM_001242957.1 | RP                                                  |
| <i>MERTK</i>                  | 2q13         | 604705 | AR          | NM_006343.2    | RP                                                  |

|                 |              |        |        |                |                                                                                         |
|-----------------|--------------|--------|--------|----------------|-----------------------------------------------------------------------------------------|
| <i>NMNAT1</i>   | 1p36.22      | 608700 | AR     | NM_022787.3    | LCA                                                                                     |
| <i>NR2E3</i>    | 15q23        | 604485 | AD; AR | NM_014249.3    | RP; Enhanced S-cone syndrome                                                            |
| <i>NRL</i>      | 14q11-q12    | 162080 | AD; AR | NM_006177.3    | RP                                                                                      |
| <i>NYX</i>      | Xp11.4       | 300278 | XL     | NM_022567.2    | CSNB                                                                                    |
| <i>OPN1LW</i>   | Xq28         | 300822 | XL     | NM_020061.4    | Blue cone monochromacy;<br>Colorblindness                                               |
| <i>OPN1MW</i>   | Xq28         | 300821 | XL     | NM_000513.2    | Blue cone monochromacy;<br>Colorblindness                                               |
| <i>OPN1SW</i>   | 7q32.1       | 613522 | AD     | NM_001708.2    | Colorblindness                                                                          |
| <i>PDE6A</i>    | 5q32         | 180071 | AR     | NM_000440.2    | RP                                                                                      |
| <i>PDE6B</i>    | 4p16.3       | 180072 | AD; AR | NM_000283.3    | CSNB; RP                                                                                |
| <i>PDE6C</i>    | 10q23.33     | 600827 | AR     | NM_006204.3    | CRD                                                                                     |
| <i>PDE6G</i>    | 17q25.3      | 180073 | AR     | NM_002602.3    | RP                                                                                      |
| <i>PDE6H</i>    | 12p12.3      | 610024 | AD; AR | NM_006205.2    | CRD; Achromatopsia                                                                      |
| <i>PITPNM3</i>  | 17p13.2p13.1 | 608921 | AD     | NM_031220.3    | CRD                                                                                     |
| <i>PLA2G5</i>   | 1p36.13      | 601192 | AR     | NM_000929.2    | Fleck retina                                                                            |
| <i>PRCD</i>     | 17q25.1      | 610598 | AR     | NM_001077620.2 | RP                                                                                      |
| <i>PROM1</i>    | 4p15.32      | 604365 | AD; AR | NM_006017.2    | CRD; MD; RP; STGD                                                                       |
| <i>PRPF3</i>    | 1q21.2       | 607301 | AD     | NM_004698.2    | RP                                                                                      |
| <i>PRPF6</i>    | 20q13.33     | 613979 | AD     | NM_012469.3    | RP                                                                                      |
| <i>PRPF8</i>    | 17p13.3      | 607300 | AD     | NM_006445.3    | RP                                                                                      |
| <i>PRPF31</i>   | 19q13.42     | 606419 | AD     | NM_015629.3    | RP                                                                                      |
| <i>PRPH2</i>    | 6p21.1       | 179605 | AD; AR | NM_000322.4    | Choroidal dystrophy; LCA; MD; RP                                                        |
| <i>RAX2</i>     | 19p13.3      | 610362 | AD     | NM_032753.3    | CRD; AMD                                                                                |
| <i>RB1</i>      | 13q14.2      | 614041 | AD     | NM_000321.2    | Retinoblastoma                                                                          |
| <i>RBP3</i>     | 10q11.22     | 180290 | AR     | NM_002900.2    | RP                                                                                      |
| <i>RD3</i>      | 1q32.3       | 180040 | AR     | NM_183059.2    | LCA                                                                                     |
| <i>RDH5</i>     | 12q13.2      | 601617 | AD; AR | NM_002905.3    | CRD; Fundus albipunctatus                                                               |
| <i>RDH12</i>    | 14q24.1      | 608830 | AR     | NM_152443.2    | LCA; RP                                                                                 |
| <i>RGR</i>      | 10q23.1      | 600342 | AD; AR | NM_002921.3    | Chorioretinal atrophy or<br>degeneration; RP                                            |
| <i>RGS9</i>     | 17q24.1      | 604067 | AR     | NM_003835.3    | Delayed cone adaptation                                                                 |
| <i>RGS9BP</i>   | 19q13.11     | 607814 | AR     | NM_207391.2    | Delayed cone adaptation                                                                 |
| <i>RHO</i>      | 3q22.1       | 180380 | AD; AR | NM_000539.3    | CSNB; RP; Retinitis punctata<br>albescens                                               |
| <i>RIMS1</i>    | 6q13         | 606629 | AD     | NM_014989.5    | CRD                                                                                     |
| <i>RLBP1</i>    | 15q26.1      | 180090 | AD; AR | NM_000326.4    | Bothnia retinal dystrophy; Fundus<br>albipunctatus; RP; Retinitis punctata<br>albescens |
| <i>ROM1</i>     | 11q12.3      | 180721 | AD; AR | NM_000327.3    | RP                                                                                      |
| <i>RP1</i>      | 8q11.2-q12.1 | 603937 | AD; AR | NM_006269.1    | RP                                                                                      |
| <i>RP2</i>      | Xp11.3       | 312600 | XL     | NM_006915.2    | RP                                                                                      |
| <i>RP9</i>      | 7p14.3       | 607331 | AD     | NM_203288.1    | RP                                                                                      |
| <i>RP1L1</i>    | 8p23.1       | 608581 | AD; AR | NM_178857.5    | Occult macular dystrophy; RP                                                            |
| <i>RPE65</i>    | 1p31.3       | 180069 | AR     | NM_000329.2    | LCA; RP                                                                                 |
| <i>RPGR</i>     | Xp11.4       | 312610 | XL     | NM_001034853.1 | CRD; MD; RP                                                                             |
| <i>RPGRIP1</i>  | 14q11.2      | 605446 | AR     | NM_020366.3    | CRD; LCA                                                                                |
| <i>RS1</i>      | Xp22.13      | 312700 | XL     | NM_000330.3    | Retinoschisis                                                                           |
| <i>SAG</i>      | 2q37.1       | 181031 | AR     | NM_000541.4    | RP; Oguchi disease                                                                      |
| <i>SEMA4A</i>   | 1q22         | 607292 | AD; AR | NM_001193301.1 | CRD; RP                                                                                 |
| <i>SLC24A1</i>  | 15q22.31     | 603617 | AR     | NM_004727.2    | CSNB                                                                                    |
| <i>SNRNP200</i> | 2q11.2       | 601664 | AD     | NM_014014.4    | RP                                                                                      |
| <i>SPATA7</i>   | 14q31.3      | 609868 | AR     | NM_018418.4    | LCA; RP                                                                                 |
| <i>TEAD1</i>    | 11p15.3      | 189967 | AD     | NM_021961.5    | Chorioretinal atrophy                                                                   |
| <i>TIMP3</i>    | 22q12.3      | 188826 | AD     | NM_000362.4    | MD                                                                                      |

|                                        |              |        |        |                |                                                                                         |
|----------------------------------------|--------------|--------|--------|----------------|-----------------------------------------------------------------------------------------|
| <i>TMEM126A</i>                        | 11q14.1      | 612988 | AR     | NM_032273.3    | Optic Atrophy                                                                           |
| <i>TOPORS</i>                          | 9p21.1       | 609507 | AD     | NM_005802.4    | RP                                                                                      |
| <i>TRPM1</i>                           | 15q13.3      | 603576 | AR     | NM_001252020.1 | CSNB                                                                                    |
| <i>TSPAN12</i>                         | 7q31.31      | 613138 | AD     | NM_012338.3    | Exudative vitreoretinopathy                                                             |
| <i>TULP1</i>                           | 6p21.31      | 602280 | AR     | NM_003322.3    | LCA; RP                                                                                 |
| <i>UNC119</i>                          | 17q11.2      | 604011 | AD     | NM_005148.3    | CRD                                                                                     |
| <i>VCAN</i>                            | 5q14.2-q14.3 | 118661 | AD     | NM_004385.4    | Wagner syndrome                                                                         |
| <i>ZNF513</i>                          | 2p23.3       | 613598 | AR     | NM_144631.5    | RP                                                                                      |
| <b>Syndromic and Non-Syndromic RDs</b> |              |        |        |                |                                                                                         |
| <i>ALMS1</i>                           | 2p13.1       | 606844 | AR     | NM_015120.4    | Alström syndrome; NS CRD                                                                |
| <i>ARL6</i>                            | 3q11.2       | 608845 | AR     | NM_032146.4    | Bardet-Biedl syndrome; NS RP                                                            |
| <i>BBS1</i>                            | 11q13.2      | 209901 | AR     | NM_024649.4    | Bardet-Biedl syndrome; NS RP                                                            |
| <i>BBS2</i>                            | 16q13        | 606151 | AR     | NM_031885.3    | Bardet-Biedl syndrome; NS RP                                                            |
| <i>C8orf37</i>                         | 8q22.1       | 614477 | AR     | NM_177965.3    | Bardet-Biedl syndrome; NS RP; CRD                                                       |
| <i>CEP290</i>                          | 12q21.32     | 610142 | AR     | NM_025114.3    | Bardet-Biedl syndrome; Joubert syndrome; NS LCA; Meckel syndrome; Senior-Loken syndrome |
| <i>CLN3</i>                            | 16p12.1      | 607042 | AR     | NM_001042432.1 | Ceroid lipofuscinosis; NS RP                                                            |
| <i>ELOVL4</i>                          | 6q14.1       | 605512 | AD     | NM_022726.3    | STGD; Spinocerebellar ataxia                                                            |
| <i>CLRN1</i>                           | 3q25.1       | 606397 | AR     | NM_001195794.1 | Usher syndrome; NS RP                                                                   |
| <i>HGSNAT</i>                          | 8p11.2-p11.1 | 610453 | AR     | NM_152419.2    | Mucopolysaccharidosis; NS RP                                                            |
| <i>IFT140</i>                          | 16p13.3      | 614620 | AR     | NM_014714.3    | Short-rib thoracic dysplasia with or without polydactyly; NS RP                         |
| <i>IQCB1</i>                           | 3q13.33      | 609237 | AR     | NM_001023570.2 | Senior-Loken syndrome; NS LCA                                                           |
| <i>LRP5</i>                            | 11q13.2      | 603506 | AD; AR | NM_002335.2    | NS Exudative vitreoretinopathy; Osteoporosis-pseudoglioma syndrome                      |
| <i>MFN2</i>                            | 1p36.22      | 608507 | AD; AR | NM_014874.3    | NS Optic Atrophy; Charcot-Marie-Tooth disease                                           |
| <i>MFSD8</i>                           | 4q28.2       | 611124 | AR     | NM_152778.2    | Ceroid lipofuscinosis; NS MD                                                            |
| <i>MVK</i>                             | 12q24.11     | 251170 | AR     | NM_000431.2    | Hyper-IgD syndrome; NS RP                                                               |
| <i>NDP</i>                             | Xp11.3       | 300658 | XL     | NM_000266.3    | NS Exudative vitreoretinopathy; Norrie disease                                          |
| <i>NEUROD1</i>                         | 2q31.3       | 601724 | AR     | NM_002500.4    | Early onset diabetes, neurologic abnormalities and retinal degeneration; NS RP          |
| <i>OFD1</i>                            | Xp22.2       | 300170 | XL     | NM_003611.2    | Joubert syndrome; Orofaciodigital syndrome; NS RP                                       |
| <i>OPA1</i>                            | 3q29         | 605290 | AD; AR | NM_130837.2    | NS Optic atrophy; Behr syndrome                                                         |
| <i>POMGNT1</i>                         | 1p34.1       | 606822 | AR     | NM_001243766.1 | Muscular dystrophy-dystroglycanopathy; NS RP                                            |
| <i>TTC8</i>                            | 14q31.3      | 608132 | AR     | NM_144596.2    | Bardet-Biedl syndrome; NS RP                                                            |
| <i>USH2A</i>                           | 1q41         | 608400 | AR     | NM_206933.2    | Usher syndrome; NS RP                                                                   |
| <b>Only Syndromic RDs</b>              |              |        |        |                |                                                                                         |
| <i>ABCC6</i>                           | 16p13.11     | 603234 | AD, AR | NM_001171.5    | Pseudoxanthoma elasticum                                                                |
| <i>ABHD12</i>                          | 20p11.21     | 613599 | AR     | NM_015600.4    | PHARC; Usher Syndrome                                                                   |
| <i>ADAMTS18</i>                        | 16q23.1      | 607512 | AR     | NM_199355.2    | Knobloch syndrome                                                                       |
| <i>ADGRV1</i>                          |              |        |        |                | Usher Syndrome; Febrile Convulsions                                                     |
| <i>GPR98</i>                           | 5q14.3       | 602851 | AD, AR | NM_032119.3    |                                                                                         |
| <i>AHI1</i>                            | 6q23.3       | 608894 | AR     | NM_017651.4    | Joubert syndrome                                                                        |
| <i>ATXN7</i>                           | 3p14.1       | 607640 | AD     | NM_001177387.1 | Spinocerebellar ataxia                                                                  |
| <i>BBS4</i>                            | 15q24.1      | 600374 | AR     | NM_033028.4    | Bardet-Biedl syndrome                                                                   |
| <i>BBS5</i>                            | 2q31.1       | 603650 | AR     | NM_152384.2    | Bardet-Biedl syndrome                                                                   |
| <i>BBS7</i>                            | 4q27         | 607590 | AR     | NM_176824.2    | Bardet-Biedl syndrome                                                                   |
| <i>BBS9</i>                            | 7p14.3       | 615986 | AR     | NM_198428.2    | Bardet-Biedl syndrome                                                                   |

|                    |              |        |        |                |                                                                                                           |
|--------------------|--------------|--------|--------|----------------|-----------------------------------------------------------------------------------------------------------|
| <i>BBS10</i>       | 12q21.2      | 610148 | AR     | NM_024685.3    | Bardet-Biedl syndrome                                                                                     |
| <i>BBS12</i>       | 4q27         | 610683 | AR     | NM_152618.2    | Bardet-Biedl syndrome                                                                                     |
| <i>C12orf65</i>    | 12q24.31     | 613541 | AR     | NM_152269.4    | Spastic paraplegia                                                                                        |
| <i>CC2D2A</i>      | 4p15.32      | 612013 | AR     | NM_001080522.2 | Joubert syndrome ; COACH syndrome; Meckel syndrome                                                        |
| <i>CDH3</i>        | 16q22.1      | 114021 | AR     | NM_001793.4    | Syndromic MD                                                                                              |
| <i>CDH23</i>       | 10q22.1      | 605516 | AR     | NM_022124.5    | Usher Syndrome                                                                                            |
| <i>CIB2</i>        | 15q25.1      | 605564 | AR     | NM_006383.3    | Usher syndrome                                                                                            |
| <i>CNNM4</i>       | 2q11.2       | 607805 | AR     | NM_020184.3    | Jalili syndrome                                                                                           |
| <i>COL11A1</i>     | 1p21.1       | 120280 | AD     | NM_080629.2    | Stickler syndrome; Marshall syndrome                                                                      |
| <i>COL2A1</i>      | 12q13.11     | 120140 | AD     | NM_001844.4    | Stickler syndrome; Bone dysplasias; Developmental disorders; Osteoarthritic diseases, Syndromic disorders |
| <i>COL9A1</i>      | 6q13         | 120210 | AD; AR | NM_001851.4    | Stickler syndrome; Multiple epiphyseal dysplasia                                                          |
| <i>DFNB31/WHRN</i> | 9q32         | 607928 | AR     | NM_015404.3    | Usher syndrome                                                                                            |
| <i>DMD</i>         | Xp21.2-p21.1 | 300377 | XL     | NM_004006.2    | Duchenne muscular dystrophy                                                                               |
| <i>ERCC6</i>       | 10q11.23     | 609413 | AR     | NM_000124.3    | Cockayne syndrome; AMD                                                                                    |
| <i>FLVCR1</i>      | 1q32.3       | 609144 | AR     | NM_014053.3    | Ataxia, posterior column with RP                                                                          |
| <i>GNPTG</i>       | 16p13.3      | 607838 | AR     | NM_032520.4    | RP and skeletal abnormalities                                                                             |
| <i>HARS</i>        | 5q31.3       | 142810 | AR     | NM_002109.4    | Usher syndrome                                                                                            |
| <i>HMX1</i>        | 4p16.1       | 142992 | AR     | NM_018942.2    | Oculoauricular syndrome                                                                                   |
| <i>INVS</i>        | 9q31.1       | 243305 | AR     | NM_014425.3    | Senior-Loken syndrome; Nephronophthisis                                                                   |
| <i>ITM2B</i>       | 13q14.2      | 603904 | AD     | NM_021999.4    | Retinal dystrophy; Dementia                                                                               |
| <i>JAG1</i>        | 20p12.2      | 601920 | AD     | NM_000214.2    | Alagille syndrome                                                                                         |
| <i>KIF11</i>       | 10q23.33     | 148760 | AD     | NM_004523.3    | Microcephaly, lymphedema and chorioretinopathy                                                            |
| <i>LAMA1</i>       | 18p11.31     | 150320 | AR     | NM_005559.3    | Poretti-Boltshauser syndrome                                                                              |
| <i>LZTFL1</i>      | 3p21.31      | 606568 | AR     | NM_020347.3    | Bardet-Biedl syndrome                                                                                     |
| <i>MFRP</i>        | 11q23.3      | 606227 | AR     | NM_031433.3    | Microphthalmos and retinal disease syndrome                                                               |
| <i>MKKS</i>        | 20p12.2      | 604896 | AR     | NM_170784.2    | Bardet-Biedl syndrome                                                                                     |
| <i>MKS1</i>        | 17q22        | 609883 | AR     | NM_017777.3    | Bardet-Biedl syndrome; Joubert syndrome; Meckel syndrome                                                  |
| <i>MYO7A</i>       | 11q13.5      | 276903 | AR     | NM_000260.3    | Usher syndrome                                                                                            |
| <i>NBAS</i>        | 2p24.3       | 608025 | AR     | NM_015909.3    | Short stature, optic nerve atrophy, and Pelger-Huet anomaly                                               |
| <i>NPHP1</i>       | 2q13         | 607100 | AR     | NM_000272.3    | Joubert syndrome; Nephronophthisis; Senior-Loken syndrome                                                 |
| <i>NPHP3</i>       | 3q22.1       | 608002 | AR     | NM_153240.4    | Senior-Loken syndrome; Nephronophthisis                                                                   |
| <i>NPHP4</i>       | 1p36.31      | 607215 | AR     | NM_015102.3    | Senior-Loken syndrome; Nephronophthisis                                                                   |
| <i>OAT</i>         | 10q26.13     | 613349 | AR     | NM_000274.3    | Gyrate atrophy of choroid and retina with or without ornithinemia                                         |
| <i>OPA3</i>        | 19q13.32     | 606580 | AD; AR | NM_001017989.2 | 3-methylglutaconic aciduria; Optic atrophy and cataract                                                   |
| <i>OTX2</i>        | 14q22.3      | 600037 | AD     | NM_021728.3    | Retinal dystrophy, early-onset, with or without pituitary dysfunction; Syndromic microphthalmia           |
| <i>PANK2</i>       | 20p13        | 606157 | AR     | NM_153638.2    | HARP syndrome                                                                                             |

|                 |          |        |             |                |                                                                                                   |
|-----------------|----------|--------|-------------|----------------|---------------------------------------------------------------------------------------------------|
| <i>PAX2</i>     | 10q24.31 | 167409 | AD          | NM_003990.3    | Papillorenal syndrome                                                                             |
| <i>PCDH15</i>   | 10q21.1  | 605514 | AR          | NM_001142763.1 | Usher syndrome                                                                                    |
| <i>PDZD7</i>    | 10q24.31 | 605472 | AR; Digenic | NM_001195263.1 | Usher syndrome                                                                                    |
| <i>PEX1</i>     | 7q21.2   | 602136 | AR          | NM_000466.2    | Refsum disease                                                                                    |
| <i>PEX2</i>     | 8q21.13  | 170993 | AR          | NM_001172086.1 | Refsum disease                                                                                    |
| <i>PEX7</i>     | 6q23.3   | 601757 | AR          | NM_000288.3    | Refsum disease                                                                                    |
| <i>PGK1</i>     | Xq21.1   | 300653 | XL          | NM_000291.3    | RP with myopathy                                                                                  |
| <i>PHYH</i>     | 10p13    | 602026 | AR          | NM_006214.3    | Refsum disease                                                                                    |
| <i>PNPLA6</i>   | 19p13.2  | 603197 | AR          | NM_001166111.1 | Laurence-Moon syndrome; Boucher-Neuhauser syndrome; Oliver-McFarlane syndrome                     |
| <i>PRPS1</i>    | Xq22.3   | 311850 | XL          | NM_002764.3    | Arts syndrome; Charcot-Marie-Tooth disease                                                        |
| <i>RBP4</i>     | 10q23.33 | 180250 | AR          | NM_006744.3    | Retinal dystrophy, iris coloboma, and comedogenic acne syndrome                                   |
| <i>RPGRIP1L</i> | 16q12.2  | 610937 | AR          | NM_015272.2    | COACH syndrome; Joubert syndrome                                                                  |
| <i>SDCCAG8</i>  | 1q43-q44 | 613524 | AR          | NM_006642.3    | Bardet-Biedl syndrome; Senior-Loken syndrome                                                      |
| <i>TIMM8A</i>   | Xq22.1   | 300356 | XL          | NM_004085.3    | Mohr-Tranebjaerg syndrome                                                                         |
| <i>TMEM216</i>  | 11q12.2  | 613277 | AR          | NM_001173991.2 | Joubert syndrome                                                                                  |
| <i>TMEM237</i>  | 2q33.1   | 614423 | AR          | NM_001044385.2 | Joubert syndrome                                                                                  |
| <i>TREX1</i>    | 3p21.31  | 606609 | AD          | NM_016381.4    | Vasculopathy, retinal, with cerebral leukodystrophy                                               |
| <i>TRIM32</i>   | 9q33.1   | 602290 | AR          | NM_012210.3    | Bardet-Biedl syndrome                                                                             |
| <i>TTPA</i>     | 8q12.3   | 600415 | AD; AR      | NM_000370.3    | RP and/or ataxia                                                                                  |
| <i>TUBGCP6</i>  | 22q13.33 | 610053 | AR          | NM_020461.3    | Microcephaly and chorioretinopathy                                                                |
| <i>USH1C</i>    | 11p15.1  | 605242 | AR          | NM_153676.3    | Usher syndrome                                                                                    |
| <i>USH1G</i>    | 17q25.1  | 607696 | AR          | NM_173477.2    | Usher syndrome                                                                                    |
| <i>VPS13B</i>   | 8q22.2   | 607817 | AR          | NM_017890.4    | Cohen syndrome                                                                                    |
| <i>WDPCP</i>    | 2p15     | 613580 | AR          | NM_015910.5    | Bardet-Biedl syndrome                                                                             |
| <i>WDR19</i>    | 4p14     | 608151 | AR          | NM_025132.3    | Cranioectodermal dysplasia; Short-rib thoracic dysplasia; Nephronophthisis; Senior-Loken syndrome |
| <i>WFS1</i>     | 4p16.1   | 606201 | AD; AR      | NM_006005.3    | Wolfram syndrome                                                                                  |

**The panel used in this study contains 199 RD-related genes, including 104 genes implicated only in non-syndromic RDs, 23 genes involved in both syndromic and non-syndromic forms of RDs, and 72 genes implicated only in syndromic RDs. Gene information was obtained from the Retinal Information Network (RETNET) and the Online Mendelian Inheritance in Man (OMIM) catalog (Accessed december 2018). NM\_ID represents the transcript used for variant analysis and sequencing data analysis.** AMD: Age-related macular degeneration; CRD: Cone-Rod dystrophy; CSNB: Congenital stationary night blindness; LCA: Leber Congenital Amaurosis; MD: Macular dystrophy; RP: Retinitis Pigmentosa; STGD: Stargardt disease; NS: Non-syndromic; AD: Autosomal Dominant; AR: Autosomal Recessive; XL: X-Linked.

**Supp. Table S2.- American College of Medical Genetics and Genomics (ACMG) criteria for classification of novel variants as pathogenic or likely pathogenic.**

| Patient | Gene    | c.DNA variant                                            | Protein alteration      | ACMG criteria                               |
|---------|---------|----------------------------------------------------------|-------------------------|---------------------------------------------|
| 3632    | ABCA4   | c.1417_1420dupATTA                                       | p.Thr474AsnfsTer4       | Pathogenic (PVS1, PM3, PP1, PP4)            |
| 3585    |         | c.4854G>C                                                | p.Trp1618Cys            | Likely Pathogenic (PM2, PM3, PP3, PP4)      |
| 1175    |         | c.6282+3A>T                                              | splicing                | Likely pathogenic (PM2, PM3, PP3, PP4)      |
| 3286    |         | c.3383A>G                                                | p.Asp1128Gly            | Likely pathogenic (PM2, PM3, PP3, PP4)      |
| 3286    |         | c.4804delA                                               | p.Ile1602TyrfsTer8      | Pathogenic (PVS1, PM2, PP4)                 |
| 3602    | AHI1    | c.2029A>C                                                | p.Thr677Pro             | Likely pathogenic (PM1, PM2, PP1, PP3, PP4) |
| 1521    | ARL6    | c.373dupA                                                | p.Ile125AsnfsTer7       | Pathogenic (PVS1, PM2, PP4)                 |
| 2831    | BBS9    | c.1329+1738C>T                                           | Deep-intronic           | Likely pathogenic (PS3, PM2, PP3, PP4)      |
| 1977    | CDHR1   | c.963G>C                                                 | p.Gln321His             | Likely pathogenic (PM2, PM3, PP1, PP3, PP4) |
| 1977    |         | c.2041-2A>C                                              | splicing                | Pathogenic (PVS1, PM2, PP1, PP3, PP4)       |
| 3593    | CEP290  | c.2605C>T                                                | p.Gln869Ter             | Pathogenic (PVS1, PM2, PP4)                 |
| 2792    | CERKL   | c.1633_1636dupATCA                                       | p.Ser546AsnfsTer21      | Pathogenic (PVS1, PM2, PP1, PP4)            |
| 2699    |         | c.424_427delAATT                                         | p.Asn142Ter             | Pathogenic (PVS1, PM2, PM3, PP4)            |
| 2699    |         | c.1030_1039dupTGGGTCT                                    | p.Ser347LeufsTer77      | Pathogenic (PVS1, PM2, PM3, PP4)            |
| 3919    | CLN3    | c.266G>A                                                 | p.Arg89Gln              | Pathogenic (PS1, PM2, PP1, PP2, PP3, PP4)   |
| 3436    | CLRN1   | c.41G>A                                                  | p.Gly14Glu              | Likely Pathogenic (PM2, PM3, PM5, PP3, PP4) |
| 3480    | CRB1    | c.2797T>C                                                | p.Cys933Arg             | Likely Pathogenic (PM1, PM2, PM3, PP3, PP4) |
| 197     |         | c.3158T>A                                                | p.Met1053Lys            | Likely Pathogenic (PM2, PM3, PM5, PP3, PP4) |
| 3043    |         | c.3822C>A                                                | p.Cys1274Ter            | Pathogenic (PVS1, PM2, PP4)                 |
| 3662    | GNAT1   | c.282delT                                                | p.Ala95HisfsTer9        | Pathogenic (PVS1, PM2, PP4)                 |
| 2996    | GUCA1A  | c.328_337delGATGAGCTGC                                   | p.Asp110SerfsTer18      | Pathogenic (PVS1, PM2, PP4)                 |
| 2257    | GUCY2D  | c.1157delA                                               | p.Gln386ArgfsTer9       | Pathogenic (PVS1, PM2, PP4)                 |
| 1985    |         | c.982G>C                                                 | p.Ala328Pro             | Likely pathogenic (PM2, PM3, PP1, PP4)      |
| 1985    |         | c.997G>A                                                 | p.Glu333Lys             | Likely Pathogenic (PM2, PM3, PP1, PP3, PP4) |
| 3525    |         | c.2705T>C                                                | p.Val902Ala             | Likely pathogenic (PM1, PM2, PP1, PP3, PP4) |
| 3868    | IDH3B   | c.857G>A                                                 | p.Gly286Glu             | Likely pathogenic (PM1, PM2, PP2, PP3, PP4) |
| 1830    | IFT140  | c.2786delC                                               | p.Thr929SerfsTer21      | Pathogenic (PVS1, PM2, PM3, PP4)            |
| 3068    |         | c.4252C>T                                                | p.Gln1418Ter            | Pathogenic (PVS1, PM2, PP1, PP4)            |
| 3332    | IMPG2   | c.3093_3097dupTGGAG                                      | p.Glu1033ValfsTer13     | Pathogenic (PVS1, PM2, PM3, PP1, PP4)       |
| 3332    |         | c.2038delG                                               | p.Glu680SerfsTer21      | Pathogenic (PVS1, PM2, PM3, PP1, PP4)       |
| 1602    |         | c.2887A>G                                                | p.Ser963Gly             | Likely pathogenic (PM1, PM2, PP1, PP3, PP4) |
| 1274    | LRAT    | c.614_615delCT                                           | p.Ser205TyrfsTer51      | Pathogenic (PVS1, PM2, PP1, PP4)            |
| 1140    | MERTK   | c.2531G>A                                                | p.Arg844His             | Pathogenic (PS*, PM1, PM2, PM5, PP3, PP4)   |
| 3531    | MYO7A   | c.(2282+1_2283-1_2904+1_2905-1)del (exon 20-23 deletion) | -----                   | Pathogenic (PVS1, PM2, PP1, PP4)            |
| 3635    | PDE6A   | c.2302G>T                                                | p.Glu768Ter             | Pathogenic (PVS1, PM2, PP1, PP4)            |
| 3527    | RP1     | c.3150delA                                               | p.Lys1050AsnfsTer7      | Pathogenic (PVS1, PM2, PP4)                 |
| 2637    | RP2     | Del exon 2                                               | c.(?-1)_768+1_769-1)del | Pathogenic (PVS1, PM2, PP1, PP4)            |
| 3354    |         | c.969+2T>G                                               | splicing                | Pathogenic (PVS1, PM2, PP1, PP4)            |
| 3533    |         | c.1A>G                                                   | p.Met1?                 | Pathogenic (PVS1, PS*, PM2, PP4)            |
| 3544    | RPE65   | c.405T>A                                                 | p.Asn135Lys             | Likely pathogenic (PM2, PP1, PP2, PP3, PP4) |
| 3751    |         | c.61delG                                                 | p.Glu21AsnfsTer10       | Pathogenic (PVS1, PM2, PM3, PP2, PP4)       |
| 3261    |         | c.386C>T                                                 | p.Thr129Ile             | Likely pathogenic (PM2, PM3, PP2, PP3, PP4) |
| 2934    |         | c.190delC                                                | p.Gln64LysfsTer30       | Pathogenic (PVS1, PM2, PM3, PP4)            |
| 3340    | RPGR    | c.1859_1860delAG                                         | p.Lys620ArgfsTer9       | Pathogenic (PVS1, PM2, PP4)                 |
| 3483    | RPGRIP1 | c.1624delG                                               | p.Ala542GlnfsTer2       | Pathogenic (PVS1, PM2, PP4)                 |
| 3592    |         | c.1116delA                                               | p.Lys372AsnfsTer3       | Pathogenic (PVS1, PM2, PP4)                 |
| 2583    | TTC8    | c.674G>A                                                 | p.Trp225Ter             | Pathogenic (PVS1, PM2, PP4)                 |
| 2669    | TULP1   | c.1102G>A                                                | p.Gly368Arg             | Likely pathogenic (PM2, PM5, PP1, PP3, PP4) |
| 2666    | USH2A   | c.11387C>T                                               | p.Pro3796Leu            | Likely pathogenic (PM1, PM2, PP1, PP3, PP4) |
| 1180    |         | c.5218delA                                               | p.Ile1740PhefsTer10     | Pathogenic (PVS1, PM1, PM2, PM3, PP1, PP4)  |



|      |  |              |              |                                             |
|------|--|--------------|--------------|---------------------------------------------|
| 3268 |  | c.3629T>C    | p.Leu1210Pro | Likely pathogenic (PM1, PM2, PM3, PP3, PP4) |
| 3776 |  | c.11389+1G>A | Splicing     | Pathogenic (PVS1, PS*, PM2, PP4)            |
| 4066 |  | c.13448C>T   | p.Pro4450Ser | Likely pathogenic (PM1, PM2, PM3, PP3, PP4) |

**ACMG criteria:**

Very strong (PVS1): null variant (nonsense, frameshift, canonical  $\pm 1$  or 2 splice sites, initiation codon, single or multiexon deletion) in a gene where LOF is a known mechanism of disease.

Strong (PS): 1. Same amino acid change as a previously established pathogenic variant regardless of nucleotide change

2. De novo (both maternity and paternity confirmed) in a patient with the disease and no family history

\*Variant segregates in multiple affected family members

3. Moderate (PM): 2. Absent from controls (or at extremely low frequency if recessive) in Exome Sequencing Project, 1000 Genomes Project, or Exome Aggregation Consortium.

3. For recessive disorders, detected in trans with a pathogenic variant

5. Novel missense change at an amino acid residue where a different missense change determined to be pathogenic has been seen before.

6. Assumed de novo, but without confirmation of paternity and maternity.

Supporting (PP): 1. Cosegregation with disease in multiple affected family members in a gene definitively known to cause the disease.

3. Multiple lines of computational evidence support a deleterious effect on the gene or gene product (conservation, evolutionary, splicing impact, etc.).

4. Patient's phenotype or family history is highly specific for a disease with a single genetic etiology

From: Richards, S., Aziz, N., Bale, S., Bick, D., Das, S., Gastier-Foster, J., ... & Rehm, H.L. ACMG Laboratory Quality Assurance Committee. (2015). Standards and guidelines for the interpretation of sequence variants: a joint consensus recommendation of the American College of Medical Genetics and Genomics and the Association for Molecular Pathology. *Genetics in Medicine*, 17:405-24

**Supp. Table S3: *In silico* pathogenicity analysis and population frequency of novel missense and splicing variants identified in our study.**

| ID   | Gene   | NM ID          | cDNA Change    | Protein change | SIFT               | POLYPHEN-2                | MUTATION TASTER 2       | ALAMUT                       | GnomAD      |
|------|--------|----------------|----------------|----------------|--------------------|---------------------------|-------------------------|------------------------------|-------------|
| 3585 | ABCA4  | NM_000350.2    | c.4854G>C      | p.Trp1618Cys   | deleterious (0)    | probably damaging (1)     | Disease Causing (1)     | N/A                          | 0.00001593  |
| 3286 | ABCA4  | NM_000350.2    | c.3383A>G      | p.Asp1128Gly   | deleterious (0)    | possibly damaging (0.894) | Disease Causing (1)     | N/A                          | N/A         |
| 1175 | ABCA4  | NM_000350.2    | c.6282+3A>T    | N/A            | N/A                | N/A                       | N/A                     | Prevents donor site (4/5)    | N/A         |
| 3602 | AHI1   | NM_017651.4    | c.2029 A>C     | p. Thr677Pro   | deleterious (0)    | probably damaging (1)     | Disease Causing (1)     | N/A                          | N/A         |
| 2831 | BBS9   | NM_198428.2    | c.1329+1738C>T | N/A            | N/A                | N/A                       | N/A                     | Creates new donor site (4/5) | N/A         |
| 1977 | CDHR1  | NM_033100.3    | c.963G>C       | p.Gln321His    | deleterious (0)    | probably damaging (0.978) | Disease Causing (1)     | N/A                          | 0.000003985 |
|      |        |                | c.2041-2A>C    | N/A            | N/A                | N/A                       | N/A                     | Prevents acceptor site (5/5) | 0.00002394  |
| 3919 | CLN3   | NM_001042432.1 | c.266G>A       | p.Arg89Gln     | tolerated (0.37)   | probably damaging (0.997) | Disease Causing (0.999) | N/A                          | N/A         |
| 3436 | CLRN1  | NM_001195794.1 | c.41 G>A       | p.Gly14Glu     | deleterious (0.01) | probably damaging (1)     | Disease Causing (1)     | N/A                          | N/A         |
| 3480 | CRB1   | NM_201253.2    | c.2797T>C      | p.Cys933Arg    | deleterious (0)    | probably damaging (0.998) | Disease Causing (1)     | N/A                          | N/A         |
| 197  | CRB1   | NM_201253.2    | c.3158T>A      | p.Met1053Lys   | deleterious (0)    | probably damaging (0.994) | Disease Causing (1)     | N/A                          | N/A         |
| 3525 | GUCY2D | NM_000180.3    | c.2705T>C      | p.Val902Ala    | deleterious (0)    | probably damaging (1)     | Disease Causing (1)     | N/A                          | N/A         |
| 1985 | GUCY2D | NM_000180.3    | c.982G>C       | p.Ala328Pro    | deleterious (0)    | probably damaging (1)     | Disease Causing (9.27)  | N/A                          | N/A         |
|      |        |                | c.997G>A       | p.Glu333Lys    | deleterious (0)    | probably damaging (0.983) | Disease Causing (0.999) | N/A                          | 0.000004255 |
| 1602 | IMPG2  | NM_016247.3    | c.2887 A>G     | p.Ser963Gly    | deleterious (0)    | probably damaging (1)     | Disease Causing (1)     | N/A                          | N/A         |
| 1140 | MERTK  | NM_006343.2    | c.2531G>A      | p.Arg844His    | deleterious (0.02) | probably damaging (1)     | Disease Causing (1)     | N/A                          | 0.00001193  |
| 3354 | RP2    | NM_006915.2    | c.969+2T>G     | N/A            | N/A                | N/A                       | N/A                     | Prevents donor site (4/4)    | N/A         |
| 3261 | RPE65  | NM_000329.2    | c.386 C>T      | p.Thr129Ile    | tolerated (0.14)   | probably damaging (1)     | Disease Causing (1)     | N/A                          | 0.000003980 |
| 3544 | RPE65  | NM_000329.2    | c.405T>A       | p.Asn135Lys    | tolerated (0.28)   | probably damaging (0.999) | Disease Causing (1)     | N/A                          | N/A         |
| 2666 | USH2A  | NM_206933.2    | c.11387C>T     | p.Pro3796Leu   | deleterious (0)    | probably damaging (0.999) | Disease Causing (1)     | N/A                          | 0.00001621  |
| 3268 | USH2A  | NM_206933.2    | c.3629T>C      | p.Leu1210Pro   | deleterious (0)    | probably damaging (1)     | Disease Causing (1)     | N/A                          | N/A         |
| 3776 | USH2A  | NM_206933.2    | c.11389+1G>A   | N/A            | N/A                | N/A                       | N/A                     | Prevents donor site (4/4)    | N/A         |
| 4066 | USH2A  | NM_206933.2    | c.13348 C>T    | p.Pro4450Ser   | tolerated (0.15)   | probably damaging (1)     | Disease Causing (1)     | N/A                          | 0.0000279   |
| 2669 | TULP1  | NM_003322.3    | c.1102G>A      | p.Gly368Arg    | deleterious (0.01) | probably damaging (1)     | Disease Causing (1)     | N/A                          | 0.000003979 |

Missense and splicing site predictions were generated using the Alamut Visual v.2.10 (<https://www.interactive-biosoftware.com/alamut-visual/>). This program uses the Sorting Intolerant from Tolerant (SIFT, <https://sift.bii.a-star.edu.sg/>), Polymorphism Phenotyping v2 (PolyPhen-2, <http://genetics.bwh.harvard.edu/pph2/>), and mutation Taster 2 (<http://www.mutationtaster.org/>) algorithms to make pathogenicity predictions of missense variants (default parameters and program options were used). Alamut also uses 5 distinct algorithms (SpliceSiteFinder-like, MaxEntScan, NNPLICE, GeneSplicer, and Human Splicing Finder) to evaluate effects of variants on the splicing process. GnomAD database was used to obtain population frequencies. “( )” next to SIFT and PolyPhen-2 columns indicate Pathogenicity Scores; “( )” next to the Mutation Taster column indicate p-Values; “( )” next to Alamut column indicates the number of splicing site algorithms used by Alamut that reached the same prediction. N/A: Not available. ***In silico* tools ranges and scores:** SIFT ranges: The amino acid substitution is predicted damaging if the score is  $\leq 0.05$ , and tolerated if the score is  $> 0.05$ . **Polyphen-2:** 0.0 to 0.15: Variant is predicted to be benign; 0.15 to 1.0: Variants are possibly damaging; 0.85 to 1.0: Variant is predicted to be damaging. **Mutation Taster 2:** This tool provides a probability value of the prediction; a value close to 1 indicates a high “security” of the prediction; scores below 0.5 indicate a low confidence prediction.

**Supp. Table S4: *In silico* pathogenicity predictions and population frequencies for heterozygous variants detected in recessive genes from unsolved cases.**

| ID                                | Gene    | Genotype     | cDNA Change   | Protein change     | SIFT               | PolyPhen-2                | Mutation Taster 2       | Splicing                    | GnomAD      | Refs. |
|-----------------------------------|---------|--------------|---------------|--------------------|--------------------|---------------------------|-------------------------|-----------------------------|-------------|-------|
| <b>Retinitis Pigmentosa (AR)</b>  |         |              |               |                    |                    |                           |                         |                             |             |       |
| EC02                              | CNGB1   | Heterozygous | c.458+8C>T    | N/A                | N/A                | N/A                       | N/A                     | Creates acceptor site (2/5) | 0.00005613  | N/A   |
|                                   | USH2A   | Heterozygous | c.10999A>C    | p.Thr3667Pro       | deleterious (0.03) | possibly damaging (0.949) | polymorphism (1)        | N/A                         | 0.0000938   | 1     |
| 257                               | AHI1    | Heterozygous | c.1585delA    | p.Thr529HisfsTer4  | N/A                | N/A                       | N/A                     | N/A                         | N/A         | N/A   |
| 3349                              | EYS     | Heterozygous | c.3250A>C     | p.Thr1084Pro       | Tolerated (0.26)   | Benign (0.001)            | polymorphism (1)        | N/A                         | 0.000154    | 2     |
|                                   |         | Heterozygous | c.3443+1G>T   | N/A                | N/A                | N/A                       | N/A                     | Prevents Donor Site (5/5)   | 0.0000619   | 2, 3  |
|                                   |         | Heterozygous | c.4402 G>C    | p.Asp1468His       | Deleterious (0)    | probably damaging (0.996) | polymorphism (1)        | N/A                         | 0.000189    | 2, 3  |
| <b>Simplex RP</b>                 |         |              |               |                    |                    |                           |                         |                             |             |       |
| EC01                              | CNGB1   | Heterozygous | c.2656G>A     | p.Ala886Thr        | deleterious (0)    | probably damaging (1)     | disease causing (1)     | N/A                         | 0.00009361  | N/A   |
| EC03                              | HGSNAT  | Heterozygous | c.852G>T      | p.Trp284Cys        | tolerated (0.1)    | benign (0.289)            | disease causing (1)     | N/A                         | 0.000008136 | N/A   |
|                                   | NMNAT1  | Heterozygous | c.769G>A      | p.Glu257Lys        | tolerated (0.25)   | benign (0.089)            | disease causing (1)     | N/A                         | 0.0006968   | 4     |
| EC06                              | PDZD7   | Heterozygous | c.2089delG    | p.Ala697ProfsTer26 | N/A                | N/A                       | N/A                     | N/A                         | 0.0002736   | N/A   |
| 3362                              | USH2A   | Heterozygous | c.13519T>C    | p.Tyr4507His       | deleterious (0)    | probably damaging (1)     | disease causing (1)     | N/A                         | 0.000004069 | N/A   |
| 3580                              | LRAT    | Heterozygous | c.658A>C      | p.Ile220Leu        | tolerated (0.31)   | benign (0.004)            | disease causing (0.976) | N/A                         | N/A         | N/A   |
|                                   | CNGB3   | Heterozygous | c.397C>T      | p.His133Tyr        | deleterious (0.03) | possibly damaging (0.885) | polymorphism (1)        | N/A                         | 0.000004061 | N/A   |
|                                   | RD3     | Heterozygous | c.541C>G      | p.Leu181Val        | tolerated (0.16)   | benign (0.039)            | polymorphism (1)        | N/A                         | N/A         | N/A   |
| 3865                              | PDE6B   | Heterozygous | c.2206G>A     | p.Val736Met        | deleterious (0.01) | probably damaging (1)     | disease causing (1)     | N/A                         | 0.0000122   | N/A   |
| <b>Leber Congenital Amaurosis</b> |         |              |               |                    |                    |                           |                         |                             |             |       |
| EC04                              | CRB1    | Heterozygous | c.2290C>T     | p.Arg764Cys        | tolerated (0.2)    | benign (0.007)            | disease causing (0)     | N/A                         | 0.00007953  | 5     |
| 3337                              | PNPLA6  | Heterozygous | c.3530G>A     | p.Trp1177Ter       | N/A                | N/A                       | N/A                     | N/A                         | N/A         | N/A   |
| <b>Recessive Syndromic cases</b>  |         |              |               |                    |                    |                           |                         |                             |             |       |
| 2007                              | BBS2    | Heterozygous | c.143G>A      | p.Arg48Gln         | tolerated (0.37)   | possibly damaging (0.997) | disease causing (1)     | N/A                         | 0.000008127 | N/A   |
|                                   | IFT140  | Heterozygous | c.3502G>A     | p.Glu1168Lys       | deleterious (0.03) | possibly damaging (0.986) | disease causing (1)     | N/A                         | 0.00001828  | N/A   |
| 3853                              | ADGRV1  | Heterozygous | c.5944dupT    | p.Ser1982PhefsTer2 | N/A                | N/A                       | N/A                     | N/A                         | N/A         | N/A   |
|                                   | USH2A   | Heterozygous | c.2276G>T     | p.Cys759Phe        | deleterious (0)    | probably damaging (1)     | disease Causing (1)     | N/A                         | 0.0009692   | 6     |
| 3573                              | USH2A   | Heterozygous | c.2299delG    | p.Glu767SerfsTer21 | N/A                | N/A                       | N/A                     | N/A                         | 0.0007017   | 7     |
| 3470                              | KCNV2   | Heterozygous | c.8_11delAACA | p.Lys3ArgfsTer96   | N/A                | N/A                       | N/A                     | N/A                         | 0.00004692  | 8     |
| <b>Simplex syndromic cases</b>    |         |              |               |                    |                    |                           |                         |                             |             |       |
| EC08                              | USH2A   | Heterozygous | c.1850G>A     | p.Cys617Tyr        | deleterious (0)    | probably damaging (1)     | disease Causing (1)     | N/A                         | N/A         | N/A   |
| 3292                              | RPGRIP1 | Heterozygous | c.2775G>A     | p.Trp925Ter        | N/A                | N/A                       | N/A                     | N/A                         | 0.000008123 | N/A   |

All missense and splicing site predictions were generated using the Alamut Visual v.2.10 (<https://www.interactive-biosoftware.com/alamut-visual/>). This program uses the Sorting Intolerant from Tolerant (SIFT, <https://sift.bii.a-star.edu.sg/>), Polymorphism Phenotyping v2 (PolyPhen-2, <http://genetics.bwh.harvard.edu/pph2/>), and mutation Taster 2 (<http://www.mutationtaster.org/>) algorithms to make pathogenicity predictions of missense variants (default parameters and program options were used). The GnomAD database was used to obtain population frequencies. “( )” next

to SIFT and PolyPhen-2 columns indicate Pathogenicity Scores; “( )” next to the Mutation Taster column indicate p-Values; “( )” next to the Splicing column indicates the number of splicing site algorithms used in Alamut that reached the same prediction. N/A: Not available. **In silico tools ranges and scores:** **SIFT** ranges: The amino acid substitution is predicted damaging if the score is  $\leq 0.05$ , and tolerated if the score is  $> 0.05$ . **Polyphen-2:** 0.0 to 0.15: Variant is predicted to be benign; 0.15 to 1.0: Variants are possibly damaging; 0.85 to 1.0: Variant is predicted to be damaging. **Mutation Taster 2:** This tool provides a probability value of the prediction; a value close to 1 indicates a high “security” of the prediction; scores below 0.5 indicate a low confidence prediction.

#### Table S4 References

1. Miyagawa, M., Naito, T., Nishio, S. Y., Kamatani, N., Usami, S. (2013). Targeted exon sequencing successfully discovers rare causative genes and clarifies the molecular epidemiology of Japanese deafness patients. *PLoS One*, 8, e71381.
2. Wang J, Zhang VW, Feng Y, et al. Dependable and efficient clinical utility of target capture-based deep sequencing in molecular diagnosis of retinitis pigmentosa. *Invest Ophthalmol Vis Sci*. 2014;55:6213–6223. DOI:10.1167/iovs.14-14936
3. Ge, Z. et al., 2015. NGS-based Molecular diagnosis of 105 eyeGENE® probands with Retinitis Pigmentosa. *Scientific Reports*, 5, pp.1–9.
4. Perrault, I., Hanein, S., Zanlonghi, X., Serre, V., Nicouleau, M., Defoort-Delhemmes, S., ... Rozet, J. M. (2012). Mutations in NMNAT1 cause Leber congenital amaurosis with early-onset severe macular and optic atrophy. *Nature Genetics*, 44, 975-977
5. den Hollander, A. I., ten Brink, J. B., de Kok, Y. J., van Soest, S., van den Born, L. I., van Driel, M. A., ... Bergen, A. A. (1999). Mutations in a human homologue of *Drosophila crumbs* cause retinitis pigmentosa (RP12). *Nature Genetics*, 23, 217-221.
6. Rivolta, C., Sweklo, E. A., Berson, E. L., & Dryja, T. P. (2000). Missense mutation in the USH2A gene: association with recessive retinitis pigmentosa without hearing loss. *American Journal of Human Genetics*, 66, 1975-1978.
7. Eudy, J. D., Weston, M. D., Yao, S., Hoover, D. M., Rehm, H. L., Ma-Edmonds, M., ... Sumegi, J. (1998). Mutation of a gene encoding a protein with extracellular matrix motifs in Usher syndrome type IIa. *Science*, 280, 1753-1757.
8. Wissinger, B., Schaich, S., Baumann, B., Bonin, M., Jägle, H., Friedburg, C., ... Kohl S Large deletions of the KCNV2 gene are common in patients with cone dystrophy with supernormal rod response. *Human Mutation*, 32, 1398-1406.



Missense and splicing site predictions were generated using the Alamut Visual v.2.10 (<https://www.interactive-biosoftware.com/alamut-visual/>). This program uses the Sorting Intolerant from Tolerant (SIFT, <https://sift.bii.a-star.edu.sg/>), Polymorphism Phenotyping v2 (PolyPhen-2, <http://genetics.bwh.harvard.edu/pph2/>), and mutation Taster 2 (<http://www.mutationtaster.org/>) algorithms to make pathogenicity predictions of missense variants (default parameters and program options were used). Alamut also uses 5 distinct algorithms (SpliceSiteFinder-like, MaxEntScan, NNPLICE, GeneSplicer, and Human Splicing Finder) to evaluate effects of variants on the splicing process. GnomAD database was used to obtain population frequencies. “( )” next to SIFT and PolyPhen-2 columns indicate Pathogenicity Scores; “( )” next to the Mutation Taster column indicate p-Values; “( )” next to Alamut column indicates the number of splicing site algorithms used by Alamut that reached the same prediction. N/A: Not available. ***In silico tools ranges and scores:*** SIFT ranges: The amino acid substitution is predicted damaging if the score is  $\leq 0.05$ , and tolerated if the score is  $> 0.05$ . **Polyphen-2:** 0.0 to 0.15: Variant is predicted to be benign; 0.15 to 1.0: Variants are possibly damaging; 0.85 to 1.0: Variant is predicted to be damaging. **Mutation Taster 2:** This tool provides a probability value of the prediction; a value close to 1 indicates a high “security” of the prediction; scores below 0.5 indicate a low confidence prediction. **ACMG criteria for classifying pathogenic variants:** Moderate (PM): 2. Absent from controls (or at extremely low frequency if recessive) in Exome Sequencing Project, 1000 Genomes Project, or Exome Aggregation Consortium.

Supporting (PP): 3. Multiple lines of computational evidence support a deleterious effect on the gene or gene product (conservation, evolutionary, splicing impact, etc.). 4. Patient’s phenotype or family history is highly specific for a disease with a single genetic etiology. **ACMG criteria for classifying benign variants** Strong: (BS): 2. Observed in a healthy adult individual for a recessive (homozygous), dominant (heterozygous), or X-linked (hemizygous) disorder, with full penetrance expected at an early age. Supporting (BP): 4. Multiple lines of computational evidence suggest no impact on gene or gene product (conservation, evolutionary, splicing impact, etc.)

**Supp. Table S6.- Genotypic results in 353 subjects (index cases and first and second degree relatives) analyzed in our cohort.**

|                        |                | <b>-/-</b> | <b>-/WT</b> | <b>WT/WT</b> | <b>-</b> | <b>WT</b> | <b>Total</b> |
|------------------------|----------------|------------|-------------|--------------|----------|-----------|--------------|
| <b>Recessive cases</b> | Index Cases    | 73         | --          | --           | --       | --        | 73           |
|                        | Family Members | 53         | 120         | 21           | --       | --        | 194          |
| <b>Dominant cases</b>  | Index Cases    | --         | 18          | --           | --       | --        | 18           |
|                        | Family Members | --         | 39          | 11           | --       | --        | 50           |
| <b>X-Linked Cases</b>  | Index Cases    | --         | 1           | --           | 3        | --        | 4            |
|                        | Family Members | --         | 4           | 1            | 6        | 3         | 14           |
| <b>Total</b>           |                |            |             |              |          |           | <b>353</b>   |

(-/-) : biallelic pathogenic variants; (-/WT): Heterozygous pathogenic variant; (WT/WT): Homozygous wild type; (-): Hemizygous pathogenic variant; (WT): Hemizygous wild type.

## TABLE 2 References

1. Simonelli, F., Testa, F., de Crecchio, G., Rinaldi, E., Hutchinson, A., Atkinson, A., ...Allikmets R. (2000). New ABCR mutations and clinical phenotype in Italian patients with Stargardt disease. *Investigative Ophthalmology & Visual Science*, 41, 892-897.
2. Collin, R. W., Safieh, C., Littink, K. W., Shalev, S. A., Garzozzi, H. J., Rizel, L., ...Ben-Yosef, T. (2010). Mutations in C2ORF71 cause autosomal-recessive retinitis pigmentosa. *American Journal of Human Genetics*, 86, 783-788.
3. Tuson, M., Marfany, G., & Gonzàlez-Duarte R. (2004). Mutation of CERKL, a novel human ceramide kinase gene, causes autosomal recessive retinitis pigmentosa (RP26). *American Journal of Human Genetics*, 74, 128-38.
4. den Hollander, A. I., ten Brink, J. B., de Kok, Y. J, van Soest, S., van den Born, L. I., van Driel, M. A., ... Bergen, A. A. (1999). Mutations in a human homologue of Drosophila crumbs cause retinitis pigmentosa (RP12). *Nature Genetics*, 23, 217-221.
5. Zenteno. J. C., Buentello-Volante, B., Ayala-Ramirez, R., & Villanueva-Mendoza, C. (2011). Homozygosity mapping identifies the Crumbs homologue 1 (Crb1) gene as responsible for a recessive syndrome of retinitis pigmentosa and nanophthalmos. *American Journal of Medical Genetics A*, 155A, 1001-1006.
6. Xu, M., Yang, L., Wang, F., Li, H., Wang, X., Wang, W., ... Chen, R. (2015). Mutations in human IFT140 cause non-syndromic retinal degeneration. *Human Genetics*, 134, 1069-1078.
7. Dryja, T. P., Rucinski, D. E., Chen, S. H., & Berson, E. L. (1999). Frequency of mutations in the gene encoding the alpha subunit of rod cGMP-phosphodiesterase in autosomal recessive retinitis pigmentosa. *Investigative Ophthalmology & Visual Science*, 40, 1859-1865.
8. Sothilingam, V., Garcia Garrido, M., Jiao, K., Buena-Atienza, E., Sahaboglu, A., Trifunović, D., ... Paquet-Durand, F. (2015). Retinitis pigmentosa: impact of different Pde6a point mutations on the disease phenotype. *Human Molecular Genetics*, 24, 5486-5499.
9. Gonzalez-Fernandez, F., Kurz, D., Bao, Y., Newman, S., Conway, B. P., Young, J. E., ...Khani, S. C. (1999). 11-cis retinol dehydrogenase mutations as a major cause of the congenital night-blindness disorder known as fundus albipunctatus. *Molecular Vision*, 5, 41.



10. Chacon-Camacho, O. F., Jitskii, S., Buentello-Volante, B., Quevedo-Martinez, J., & Zenteno, J. C. (2013). Exome sequencing identifies RDH12 compound heterozygous mutations in a family with severe retinitis pigmentosa. *Gene*, 528, 178-182.
11. Perrault, I., Hanein, S., Gerber, S., Barbet, F., Ducroq, D., Dollfus, H., ...Rozet, J. M. (2004). Retinal dehydrogenase 12 (RDH12) mutations in Leber congenital amaurosis. *American Journal of Human Genetics*, 75, 639-646.
12. Wang, H., den Hollander, A. I., Moayed, Y., Abulimiti, A., Li, Y., Collin, R. W., ...Chen R. (2009). Mutations in SPATA7 cause Leber congenital amaurosis and juvenile retinitis pigmentosa. *American Journal of Human Genetics*, 84, 380-387.
13. Aller, E., Nájera, C., Millán, J. M., Oltra, J. S., Pérez-Garrigues, H., Vilela, C., ... Beneyto, M. (2004). Genetic analysis of 2299delG and C759F mutations (USH2A) in patients with visual and/or auditory impairments. *European Journal of Human Genetics*, 12, 407-410.
14. Aller, E., Jaijo, T., Beneyto, M., Nájera, C., Oltra, S., Ayuso, C., ...Millán JM. (2006). Identification of 14 novel mutations in the long isoform of USH2A in Spanish patients with Usher syndrome type II. *Journal of Medical Genetics*, 43, e55.
15. McGee, T. L., Seyedahmadi, B. J., Sweeney, M. O., Dryja, T. P., & Berson, E. L. (2010). Novel mutations in the long isoform of the USH2A gene in patients with Usher syndrome type II or non-syndromic retinitis pigmentosa. *Journal of Medical Genetics*, 47, 499-506.
16. Huang, L., Mao, Y., Yang, J., Li, Y., Li, Y., & Yang, Z. (2018) Mutation screening of the USH2A gene in retinitis pigmentosa and USHER patients in a Han Chinese population. *Eye (Lond)* 32, 1608-1614.
17. Coppieters, F., Leroy, B. P., Beysen, D., Hellemans, J., De Bosscher, K., Haegeman, G., ... De Baere E. (2007). Recurrent mutation in the first zinc finger of the orphan nuclear receptor NR2E3 causes autosomal dominant retinitis pigmentosa. *American Journal of Human Genetics*, 81, 147-157.
18. DeAngelis, M. M., Grimsby, J. L., Sandberg, M. A., Berson, E. L., & Dryja TP. (2002). Novel mutations in the NRL gene and associated clinical findings in patients with dominant retinitis pigmentosa. *Archives of Ophthalmology*, 120, 369-75.
19. Martínez-Gimeno, M., Gamundi, M. J., Hernan, I., Maseras, M., Millá, E., Ayuso, C., ... Carballo M. (2003). Mutations in the pre-mRNA splicing-factor genes PRPF3, PRPF8, and PRPF31 in Spanish families with autosomal dominant retinitis pigmentosa. *Investigative Ophthalmology & Visual Science*, 44, 2171-2177.
20. Vincent, A.L., Abeysekera, N., van Bysterveldt, K. A., Oliver, V. F., Ellingford, J. M., Barton, S., & Black, G. C. (2017). Next-generation sequencing targeted disease panel in rod-cone retinal dystrophies in Māori and Polynesian reveals novel changes and a common founder mutation. *Clinical & Experimental Ophthalmology*, 45, 901-910.

21. Villanueva, A., Willer, J. R., Bryois, J., Dermitzakis, E. T., Katsanis, N., & Davis, E. E. (2014). Whole exome sequencing of a dominant retinitis pigmentosa family identifies a novel deletion in PRPF31. *Investigative Ophthalmology & Visual Science*, 55, 2121-2129.
22. Vaithinathan, R., Berson, E. L., & Dryja, T. P. (1994). Further screening of the rhodopsin gene in patients with autosomal dominant retinitis pigmentosa. *Genomics*, 21, 461-463.
23. Matias-Florentino, M., Ayala-Ramirez, R., Graue-Wiechers, F., & Zenteno, J. C. (2009) Molecular screening of rhodopsin and peripherin/RDS genes in Mexican families with autosomal dominant retinitis pigmentosa. *Current Eye Research*, 34, 1050-1056
24. Pierce, E. A., Quinn, T., Meehan, T., McGee, T. L., Berson, E. L., & Dryja, T. P. (1999). Mutations in a gene encoding a new oxygen-regulated photoreceptor protein cause dominant retinitis pigmentosa. *Nature Genetics*, 22, 248-254.
25. Xu, Y., Guan, L., Shen, T., Zhang, J., Xiao, X., Jiang, H., ... Zhang, Q. (2014). Mutations of 60 known causative genes in 157 families with retinitis pigmentosa based on exome sequencing. *Human Genetics*, 133, 1255–1271.
26. Allikmets, R., Shroyer, N. F., Singh, N., Seddon, J. M., Lewis, R. A., Bernstein, P. S., ...Leppert, M. (1997). Mutation of the Stargardt disease gene (ABCR) in age-related macular degeneration. *Science*, 277, 1805-1807.
- 27.- Hariri, A. H., Gui, W., O'Keefe, G. A. D., Ip, M. S., Sadda, S. R., & Gorin, M. B. (2017). Ultra-widefield fundus autofluorescence imaging of patients with retinitis pigmentosa. A standardized grading system in different genotypes. *Ophthalmology Retina*, 2018, 2, 735-745.
28. Xu, M., Yang, L., Wang, F., Li, H., Wang, X., Wang, W., ... Chen R. (2015). Mutations in human IFT140 cause non-syndromic retinal degeneration. *Human Genetics*, 134, 1069–1078.
29. Mackay, D. S., Dev Borman, A., Moradi, P., Henderson, R. H., Li, Z., Wright, G. A., ... Moore, A. T. (2011). RDH12 retinopathy: novel mutations and phenotypic description. *Molecular Vision*, 17, 2706-2716.
30. Simovich, M. J., Miller, B., Ezzeldin, H., Kirkland, B. T., McLeod G. , Fulmer, C., ... Pittler, S. J. (2001). Four novel mutations in the RPE65 gene in patients with Leber congenital amaurosis. *Human Mutation*, 18, 164.
31. Hull, S., Holder, G. E., Robson, A. G., Mukherjee, R., Michaelides, M., Webster, A. R., & Moore, A. T. (2016). Preserved visual function in retinal dystrophy due to hypomorphic RPE65 mutations. *British Journal of Ophthalmology*, 100, 1499-1505.
32. Hanein, S., Perrault, I., Gerber, S., Tanguy, G., Barbet, F., Ducroq, D., ... Kaplan J. (2004). Leber congenital amaurosis: comprehensive survey of the genetic heterogeneity, refinement of the clinical definition, and genotype-phenotype correlations as a strategy for molecular diagnosis. *Human Mutation*, 23, 306-317.

33. Abu-Safieh, L., Alrashed, M., Anazi, S., Alkuraya, H., Khan, A. O., Al-Owain, M., ...Alkuraya, F. S. (2013). Autozygome-guided exome sequencing in retinal dystrophy patients reveals pathogenetic mutations and novel candidate disease genes. *Genome Research*, 23, 236-247.
34. Ávila-Fernández, A., Cantalapiedra, D., Aller, E., Vallespín, E., Aguirre-Lambán, J., Blanco-Kelly, F., ...Ayuso, C. (2010). Mutation analysis of 272 Spanish families affected by autosomal recessive retinitis pigmentosa using a genotyping microarray. *Molecular Vision*, 16, 2550-2558.
35. Zhao, C., Bellur, D. L., Lu, S., Zhao, F., Grassi, M. A., Bowne, S. J., ... Larsson, C. (2009). Autosomal-dominant retinitis pigmentosa caused by a mutation in SNRNP200, a gene required for unwinding of U4/U6 snRNAs. *American Journal of Human Genetics*, 85, 617-627.
36. Stone, E. M. (2007). Leber congenital amaurosis - a model for efficient genetic testing of heterogeneous disorders: LXIV Edward Jackson Memorial Lecture. *American Journal of Ophthalmology*, 144, 791-811.
37. Lotery, A. J., Jacobson, S. G., Fishman, G. A., Weleber, R. G., Fulton, A. B., Namperumalsamy, P., ... Stone, E. M. (2001). Mutations in the CRB1 gene cause Leber congenital amaurosis. *Archives of Ophthalmology*, 119, 415-420.
38. Corton, M., Tatu, S. D., Avila-Fernandez, A., Vallespín, E., Tapias, I., Cantalapiedra, D., ...Ayuso, C. (2013). High frequency of CRB1 mutations as cause of Early-Onset Retinal Dystrophies in the Spanish population. *Orphanet Journal of Rare Diseases*, 8, 20.
39. de Castro-Miró, M., Tonda, R., Escudero-Ferruz, P., Andrés, R., Mayor-Lorenzo, A., Castro, J., ... González-Duarte, R. (2016). Novel Candidate Genes and a Wide Spectrum of Structural and Point Mutations Responsible for Inherited Retinal Dystrophies Revealed by Exome Sequencing. *PLoS One*, 11, e0168966.
40. Eisenberger, T., Neuhaus, C., Khan, A. O., Decker, C., Preising, M. N, Friedburg, C., ... Bolz HJ. (2013). Increasing the yield in targeted next-generation sequencing by implicating CNV analysis, non-coding exons and the overall variant load: the example of retinal dystrophies. *PLoS One*, 8, e78496.
41. Morimura, H., Fishman, G. A., Grover, S. A., Fulton, A. B., Berson, E. L., & Dryja, T. P. (1998). Mutations in the RPE65 gene in patients with autosomal recessive retinitis pigmentosa or leber congenital amaurosis. *Proceedings of the National Academy of Sciences U S A*, 95, 3088-3093.
42. Gu, S. M., Thompson, D. A., Srikumari, C. R., Lorenz, B., Finckh, U., Nicoletti, A. ...Gal, A. (1997). Mutations in RPE65 cause autosomal recessive childhood-onset severe retinal dystrophy. *Nature Genetics*, 17, 194-197.

43. Alapati, A., Goetz, K., Suk, J., Navani, M., Al-Tarouti, A., Jayasundera, T., ... Ayyagari, R. (2014). Molecular diagnostic testing by eyeGENE: analysis of patients with hereditary retinal dystrophy phenotypes involving central vision loss. *Investigative Ophthalmology and Visual Science*, 55, 5510-5521.
44. Henderson, R. H., Mackay, D. S, Li, Z., Moradi, P., Sergouniotis, P., Russell-Eggitt, I., ... Moore, A. T. (2011). Phenotypic variability in patients with retinal dystrophies due to mutations in CRB1. *British Journal of Ophthalmology*, 95, 811-817.
45. Bujakowska, K., Audo, I., Mohand-Saïd, S., Lancelot, M. E., Antonio, A., Germain, A. ...Zeit, C. (2012). CRB1 mutations in inherited retinal dystrophies. *Human Mutation*, 33, 306-315.
46. Allikmets, R., Singh, N., Sun, H., Shroyer, N. F., Hutchinson, A., Chidambaram, A., ... Lupski, J. R. (1997). A photoreceptor cell-specific ATP-binding transporter gene (ABCR) is mutated in recessive Stargardt macular dystrophy. *Nature Genetics*, 15, 236-246.
47. Paloma, E., Martínez-Mir, A., Vilageliu, L., González-Duarte, R., & Balcells, S. (2001). Spectrum of ABCA4 (ABCR) gene mutations in Spanish patients with autosomal recessive macular dystrophies. *Human Mutation*, 17, 504-510.
48. Chacón-Camacho, O. F., Granillo-Alvarez, M., Ayala-Ramírez, R., & Zenteno, J. C. (2013). ABCA4 mutational spectrum in Mexican patients with Stargardt disease: Identification of 12 novel mutations and evidence of a founder effect for the common p.A1773V mutation. *Experimental Eye Research*, 109, 77-82.
49. Cohn, A. C., Turnbull, C., Ruddle, J. B., Guymer, R. H., Kearns, L. S., Staffieri, S., ...Mackey, D. A. (2011). Best's macular dystrophy in Australia: phenotypic profile and identification of novel BEST1 mutations. *Eye*, 25, 208-217.
50. Yang, Z., Chen, Y., Lillo, C., Chien, J., Yu, Z., Michaelides, M., ... Zhang, K. (2008). Mutant prominin 1 found in patients with macular degeneration disrupts photoreceptor disk morphogenesis in mice. *Journal of Clinical Investigation*, 118, 2908-2916.
51. Wang, X., Feng, Y., Li, J., Zhang, W., Wang, J., Lewis, R. A., & Wong, L. J. (2016). Retinal Diseases Caused by Mutations in Genes Not Specifically Associated with the Clinical Diagnosis. *PLoS One*, 11, e0165405.
52. Rivera-Brugués, N., Albrecht, B., Wiczorek, D., Schmidt, H., Keller, T., Göhring, I., ...Hempel M. (2011). Cohen syndrome diagnosis using whole genome arrays. *Journal of Medical Genetics*, 48, 136-140.
53. Kolehmainen, J., Wilkinson, R., Lehesjoki, A. E., Chandler, K., Kivitie-Kallio, S., Clayton-Smith, J., ... Manson, F. D. (2004). Delineation of Cohen syndrome following a large-scale genotype-phenotype screen. *American Journal of Human Genetics*, 75, 122-127.

54. Adato, A., Vreugde, S., Joensuu, T., Avidan, N., Hamalainen, R., Belenkiy, O., ... Lancet, D. (2002). USH3A transcripts encode clarin-1, a four-transmembrane-domain protein with a possible role in sensory synapses. *European Journal of Human Genetics*, 10, 339-350.
55. Bernal, S., Ayuso, C., Antiñolo, G., Gimenez, A., Borrego, S., Trujillo, M. J., ... Baiget, M. (2003). Mutations in USH2A in Spanish patients with autosomal recessive retinitis pigmentosa: high prevalence and phenotypic variation. *Journal of Medical Genetics*, 40, e8.
